# Supplementary material for: Development of a Machine Learning Model Using Electronic Health Record Data to Identify Antibiotic Use Among Hospitalized Patients
Source: PubMed Central journal article supplement (PMC8008288; doi:10.1001/jamanetworkopen.2021.3460), 2021-03-29
Supplement: jamanetwopen-e213460-s001.pdf [file jamanetwopen-e213460-s001.pdf]

## Supplemental Online Content

Moehring RW, Phelan M, Lofgren E, et al. Development of a machine learning model using electronic health record data to identify antibiotic use among hospitalized patients. *JAMA Network Open*. 2012;4(3):e213460. doi:10.1001/jamanetworkopen.2021.3460

**eTable 1.** Adult and Pediatric Antimicrobial Groups

**eAppendix.** Parameterization of Variables

**eTable 2.** Summary of Models Created to Identify Antibiotic Exposure on the Encounter Level

**eFigure.** Model Calibration for Encounters With Lengths of Stay Greater Than 10 Days

**eTable 3.** Compare and Contrast Current Analyses and 2017 SAAR Method

**eTable 4.** Adult Models AUC Values

**eTable 5.** Pediatric Models AUC Values

**eReferences.**

This supplemental material has been provided by the authors to give readers additional information about their work.

eTable 1. Adult and Pediatric Antimicrobial Groups

| Adult or Pediatric | Antimicrobial Group Name Used in Tables and Figures (Abbreviation) | NHSN Antimicrobial Agent Category Title                                                        | Included Agents                                                                                                                                                                             |
|--------------------|--------------------------------------------------------------------|------------------------------------------------------------------------------------------------|---------------------------------------------------------------------------------------------------------------------------------------------------------------------------------------------|
| Adult              | All antibacterials                                                 | Adult All antibacterial agents                                                                 |                                                                                                                                                                                             |
|                    | Anti-fungal                                                        | Adult Antifungal agents predominantly used for invasive candidiasis                            | FLUCONAZOLE<br>ANIDULAFUNGIN<br>CASPOFUNGIN<br>MICA FUNGIN                                                                                                                                  |
|                    | <i>C. difficile</i> agents (CDI)                                   | Adult Antibacterial agents posing the highest risk for CDI                                     | CLINDAMYCIN<br>CIPROFLOXACIN<br>GEMIFLOXACIN<br>LEVOFLOXACIN<br>MOXIFLOXACIN<br>CEFOTAXIME<br>CEFTRIAXONE<br>CEFTAZIDIME<br>CEFEPIME<br>CEFDINIR<br>CEFPODOXIME<br>CEFIXIME                 |
|                    | Community-onset                                                    | Adult Broad spectrum antibacterial agents predominantly used for community-acquired infections | CEFOTAXIME<br>CEFTRIAXONE<br>CIPROFLOXACIN<br>ERTAPENEM<br>GEMIFLOXACIN<br>LEVOFLOXACIN<br>MOXIFLOXACIN<br>CEFDINIR<br>CEFPODOXIME<br>CEFIXIME<br>CEFUROXIME<br>CEFACTOR<br>CEFPROZIL       |
|                    | Hospital-onset                                                     | Adult Broad spectrum antibacterial agents predominantly used for hospital-onset infections     | GENTAMICIN (IV only)<br>TOBRAMYCIN (IV only)<br>AMIKACIN (IV only)<br>PIPERACILLIN/TAZOBACTAM<br>CEFTAZIDIME<br>CEFEPIME<br>IMIPENEM/CILASTATIN<br>MEROPENEM<br>AZTREONAM (IV)<br>DORIPENEM |
|                    | Narrow spectrum beta-lactam (Narrow BL)                            | Adult Narrow spectrum beta-lactam agents                                                       | CEFAZOLIN<br>CEFOTETAN<br>CEFOXITIN<br>AMPICILLIN<br>AMOXICILLIN<br>AMOXICILLIN/CLAVULANATE<br>AMPICILLIN/SULBACTAM                                                                         |

| Adult or Pediatric | Antimicrobial Group Name Used in Tables and Figures (Abbreviation) | NHSN Antimicrobial Agent Category Title                                                            | Included Agents                                                                                                                                                             |
|--------------------|--------------------------------------------------------------------|----------------------------------------------------------------------------------------------------|-----------------------------------------------------------------------------------------------------------------------------------------------------------------------------|
|                    |                                                                    |                                                                                                    | CEPHALEXIN<br>CEFADROXIL<br>PENICILLIN G<br>PENICILLIN V<br>DICLOXACILLIN<br>NAFCILLIN<br>OXACILLIN                                                                         |
|                    | Resistant gram positive                                            | Adult Antibacterial agents predominantly used for resistant Gram-positive infections (e.g., MRSA)  | CEFTAROLINE<br>DALBAVANCIN<br>DAPTOMYCIN<br>LINEZOLID<br>ORITAVANCIN<br>QUINUPRISTIN/DALFOPRISTIN<br>TEDIZOLID<br>TELAVANCIN<br>VANCOMYCIN (IV only)                        |
| Pediatric          | All Antibacterials                                                 | Pediatric All antibacterial agents                                                                 |                                                                                                                                                                             |
|                    | Anti-fungal                                                        | Pediatric Antifungal agents predominantly used for invasive candidiasis                            | FLUCONAZOLE<br>ANIDULAFUNGIN<br>CASPOFUNGIN<br>MICAUFUNGIN                                                                                                                  |
|                    | Azithromycin                                                       | Pediatric Azithromycin                                                                             | AZITHROMYCIN                                                                                                                                                                |
|                    | <i>C. difficile</i> agents (CDI)                                   | Pediatric Antibacterial agents posing the highest risk for CDI                                     | CLINDAMYCIN<br>CIPROFLOXACIN<br>GEMIFLOXACIN<br>LEVOFLOXACIN<br>MOXIFLOXACIN<br>CEFOTAXIME<br>CEFTRIAZONE<br>CEFTAZIDIME<br>CEFEPIME<br>CEFDINIR<br>CEFPODOXIME<br>CEFIXIME |
|                    | Broad Community-onset (Broad CO)                                   | Pediatric Broad spectrum antibacterial agents predominantly used for community-acquired infections | CEFOTAXIME<br>CEFTRIAZONE<br>AMPICILLIN/SULBACTAM<br>AMOXICILLIN/CLAVULANATE<br>CEFDINIR<br>CEFIXIME<br>CEFPODOXIME<br>CEFUROXIME<br>CEFACTOR<br>CEFPROZIL                  |
|                    | Narrow Community-onset (Narrow CO)                                 | Pediatric Narrow spectrum beta-lactam agents Pediatric Azithromycin                                | AMPICILLIN<br>AMOXICILLIN<br>PENICILLIN G<br>PENICILLIN V                                                                                                                   |

| Adult or Pediatric | Antimicrobial Group Name Used in Tables and Figures (Abbreviation) | NHSN Antimicrobial Agent Category Title                                                               | Included Agents                                                                                                                                                                                                                                        |
|--------------------|--------------------------------------------------------------------|-------------------------------------------------------------------------------------------------------|--------------------------------------------------------------------------------------------------------------------------------------------------------------------------------------------------------------------------------------------------------|
|                    |                                                                    |                                                                                                       | CEPHALEXIN<br>CEFAZOLIN<br>CEFADROXIL<br>NAFCILLIN<br>OXACILLIN<br>DICLOXACILLIN<br>CEFOXITIN<br>CEFOTETAN                                                                                                                                             |
|                    | Hospital-onset                                                     | Pediatric Broad spectrum antibacterial agents predominantly used for hospital-onset infections        | AMIKACIN (IV only)<br>TOBRAMYCIN (IV only)<br>AZTREONAM (IV only)<br>CEFEPIME<br>CEFTAZIDIME<br>PIPERACILLIN/TAZOBACTAM<br>ERTAPENEM<br>DORIPENEM<br>IMIPENEM/CILASTATIN<br>MEROPENEM<br>CIPROFLOXACIN<br>LEVOFLOXACIN<br>MOXIFLOXACIN<br>GEMIFLOXACIN |
|                    | Gram positive                                                      | Pediatric Antibacterial agents predominantly used for resistant Gram-positive infections (e.g., MRSA) | CEFTAROLINE<br>DAPTOMYCIN<br>LINEZOLID<br>VANCOMYCIN (IV only)<br>CLINDAMYCIN<br>DALBAVANCIN<br>ORITAVANCIN<br>QUINUPRISTIN/DALFOPRISTIN<br>TELAVANCIN<br>TEDIZOLID                                                                                    |

IV=intravenous route

## eAppendix. Parameterization of Variables

Location by NHSN category has been previously employed in risk-adjustment.<sup>1</sup> We defined each encounter by the cumulative number of days in each NHSN location. For example, if a patient spent 3 days in the medical ICU then 5 days on the medical ward, their encounter would assign 3 days attributed to the medical ICU and 5 days attributed to medical ward; the day of transfer between units would be counted in both unit-specific counts. A measure for total hospital length of stay, or days present in any inpatient unit, was also included. Analyses stratified by location were limited to resemble the 2014 SAAR location types including encounters with 1) days spent on a medical, medical/surgical, or surgical critical care unit, 2) days spent on a medical, medical/surgical, or surgical ward, and 3) days spent in any NHSN inpatient location.<sup>1,2</sup>

Comorbidities and events occurring during the encounter were defined by encounter diagnoses and procedure codes. International Classifications of Diseases 10 (ICD-10) diagnoses were grouped by the Agency for Healthcare Research and Quality Clinical Classification Software (AHRQ CCS) groups and in Charlson, Elixhauser, and Medicare Severity-Diagnosis Related Groups (MS-DRG).<sup>3,4</sup> MS-DRGs were further grouped by Centers for Medicare and Medicaid Major Diagnosis Category (MDC).<sup>3</sup> We derived a four-category seasonality variable by month of admission date. Variables in time-varying format were summarized by encounter. Vital sign measurements were expressed as minimum, median, mean, maximum over the encounter. Lab results were summarized as the number of times measured, number of high days, number of low days, number of normal days, and number of unknown days. For National Early Warning Score (NEWS) and Systemic Inflammatory Response Syndrome (SIRS) scores, we used days greater than threshold value of 7 and 2, respectively. Non-antimicrobial medications were grouped by therapeutic class defined in the EHR and measured as an ever/never exposure and the number days administered.

eTable 2. Summary of Models Created to Identify Antibiotic Exposure on the Encounter Level

| Age group + Antimicrobial group (15)                                                                                                                                                                                                                                                                                                                                                                                                                                                                      | Location (3)       | Feasibility Tier (4)       | Outcomes (2)                  |
|-----------------------------------------------------------------------------------------------------------------------------------------------------------------------------------------------------------------------------------------------------------------------------------------------------------------------------------------------------------------------------------------------------------------------------------------------------------------------------------------------------------|--------------------|----------------------------|-------------------------------|
| Adult + All antibacterials<br>Adult + Anti-fungal<br>Adult + <i>C. difficile</i> agents<br>Adult + Community-onset<br>Adult + Hospital-onset<br>Adult + Narrow spectrum beta lactam<br>Adult + Resistant Gram-positive<br>Pediatric + All antibacterials<br>Pediatric + Anti-fungal<br>Pediatric + Azithromycin<br>Pediatric + <i>C. difficile</i> agents<br>Pediatric + Broad Community-onset<br>Pediatric + Narrow Community-onset<br>Pediatric + Hospital-onset<br>Pediatric + Resistant Gram-positive | Any<br>ICU<br>Ward | 1-Easy<br>2<br>3<br>4-Hard | Ever/Never<br>Days of therapy |

Note the corresponding NHSN Antimicrobial category titles and agent lists are included in eTable 1.

Any location includes all inpatient areas mapped to an NHSN inpatient unit category. ICU locations included NHSN inpatient unit category specified as medical, medical/surgical, or surgical critical care. Ward locations included NHSN inpatient unit category specified as medical, surgical, or medical/surgical ward. This approach is different than the 2017 NHSN SAAR method (eTable 3).

eFigure. Model Calibration for Encounters With Lengths of Stay Greater Than 10 Days.

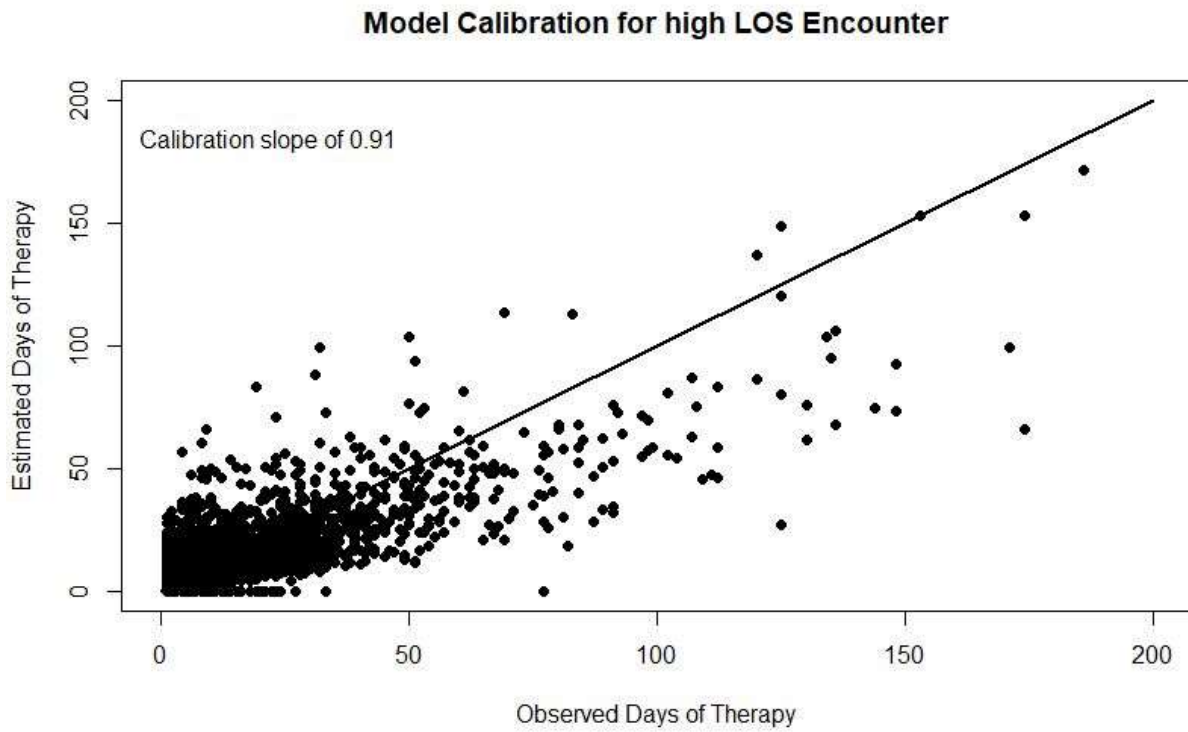

A calibration slope of 1.0 indicates perfect accuracy. The model used to produce the estimated days of therapy was the all antibacterial, adult, all locations model. LOS=length of stay

eTable 3. Compare and Contrast Current Analyses and 2017 SAAR Method

| Compare/Contrast                     | 2017 SAAR Method                                                                                                                                                                                                                                                                                                                                                                                                                                                                                                                                                                                                                                                                                                                                                                                                                                                 | Current Analyses                                                                                                                                                                                                                                                                                                                                                                                                                                                               |
|--------------------------------------|------------------------------------------------------------------------------------------------------------------------------------------------------------------------------------------------------------------------------------------------------------------------------------------------------------------------------------------------------------------------------------------------------------------------------------------------------------------------------------------------------------------------------------------------------------------------------------------------------------------------------------------------------------------------------------------------------------------------------------------------------------------------------------------------------------------------------------------------------------------|--------------------------------------------------------------------------------------------------------------------------------------------------------------------------------------------------------------------------------------------------------------------------------------------------------------------------------------------------------------------------------------------------------------------------------------------------------------------------------|
| Same                                 | Antimicrobial agent categories (see eTable 1).<br>Adult and pediatric modeled separately.<br>Outcome in days of therapy (DOT).                                                                                                                                                                                                                                                                                                                                                                                                                                                                                                                                                                                                                                                                                                                                   |                                                                                                                                                                                                                                                                                                                                                                                                                                                                                |
| Different: Unit of analysis          | Location-time (in month, quarter, or year)                                                                                                                                                                                                                                                                                                                                                                                                                                                                                                                                                                                                                                                                                                                                                                                                                       | Inpatient encounter                                                                                                                                                                                                                                                                                                                                                                                                                                                            |
| Different: Modeling strategy         | Negative binomial models estimating days of therapy with offset of 1,000 days present                                                                                                                                                                                                                                                                                                                                                                                                                                                                                                                                                                                                                                                                                                                                                                            | Random Forests, machine learning algorithms using a two-staged approach to the ever/never outcome and days of therapy per encounter                                                                                                                                                                                                                                                                                                                                            |
| Different: Population                | <p><u>Hospitals</u>: 449 hospitals in the United States</p> <p><u>Age</u>: Adult and Pediatric locations</p> <p><u>NHSN Locations included</u>:<br/>                     Adult Medical Ward<br/>                     Adult Surgical Ward<br/>                     Adult Medical/Surgical Ward<br/>                     Adult Medical Critical Care<br/>                     Adult Surgical Critical Care<br/>                     Adult Medical/Surgical Critical Care<br/>                     Adult Hematology/Oncology Ward<br/>                     Adult Step-down<br/>                     Pediatric Medical Ward<br/>                     Pediatric Medical/Surgical Ward<br/>                     Pediatric Surgical Ward<br/>                     Pediatric Medical Critical Care<br/>                     Pediatric Medical/Surgical Critical Care</p> | <p><u>Hospitals</u>: 3 Duke Health System hospitals in North Carolina</p> <p><u>Age</u>: Any inpatient encounter including adult, pediatric, and neonatal</p> <p><u>NHSN Locations included</u>:<br/>                     Any location mapped to an inpatient NHSN unit category</p> <p>Models also assessed encounters with days present on a ward (Medical, Surgical, or Medical/Surgical ward) or ICU (Medical, Surgical, or Medical/Surgical Critical Care) (eTable 2)</p> |
| Different: Variables used            | Facility- or location-level variables collected from the NHSN annual survey and AU Option (N=7)                                                                                                                                                                                                                                                                                                                                                                                                                                                                                                                                                                                                                                                                                                                                                                  | Encounter-level variables derived from the electronic health record (Table 1, N=204)                                                                                                                                                                                                                                                                                                                                                                                           |
| Different: Model performance measure | Not reported in 2017 analysis, <sup>5</sup> previously pseudo-R squared <sup>1</sup>                                                                                                                                                                                                                                                                                                                                                                                                                                                                                                                                                                                                                                                                                                                                                                             | Area Under the Curve (AUC) for ever/never outcome and Absolute Error in days of therapy                                                                                                                                                                                                                                                                                                                                                                                        |



eTable 4. Adult Models AUC Values

| SAAR Group                       | Location | Tier | Lower 95% CI | AUC   | Upper 95% CI |
|----------------------------------|----------|------|--------------|-------|--------------|
| All antibacterials               | ALL      | 1    | 0.820        | 0.825 | 0.829        |
| All antibacterials               | ALL      | 2    | 0.869        | 0.873 | 0.877        |
| All antibacterials               | ALL      | 3    | 0.870        | 0.874 | 0.878        |
| All antibacterials               | ALL      | 4    | 0.884        | 0.888 | 0.891        |
| All antibacterials               | ICU      | 1    | 0.774        | 0.791 | 0.809        |
| All antibacterials               | ICU      | 2    | 0.822        | 0.838 | 0.853        |
| All antibacterials               | ICU      | 3    | 0.819        | 0.834 | 0.850        |
| All antibacterials               | ICU      | 4    | 0.831        | 0.847 | 0.862        |
| All antibacterials               | WARD     | 1    | 0.777        | 0.783 | 0.790        |
| All antibacterials               | WARD     | 2    | 0.839        | 0.845 | 0.851        |
| All antibacterials               | WARD     | 3    | 0.836        | 0.842 | 0.848        |
| All antibacterials               | WARD     | 4    | 0.855        | 0.860 | 0.865        |
| <i>C. difficile</i> agents (CDI) | ALL      | 1    | 0.787        | 0.792 | 0.798        |
| <i>C. difficile</i> agents (CDI) | ALL      | 2    | 0.839        | 0.843 | 0.848        |
| <i>C. difficile</i> agents (CDI) | ALL      | 3    | 0.845        | 0.850 | 0.854        |
| <i>C. difficile</i> agents (CDI) | ALL      | 4    | 0.864        | 0.868 | 0.873        |
| <i>C. difficile</i> agents (CDI) | ICU      | 1    | 0.698        | 0.718 | 0.738        |
| <i>C. difficile</i> agents (CDI) | ICU      | 2    | 0.741        | 0.760 | 0.779        |
| <i>C. difficile</i> agents (CDI) | ICU      | 3    | 0.742        | 0.761 | 0.780        |
| <i>C. difficile</i> agents (CDI) | ICU      | 4    | 0.752        | 0.771 | 0.789        |
| <i>C. difficile</i> agents (CDI) | WARD     | 1    | 0.741        | 0.749 | 0.757        |
| <i>C. difficile</i> agents (CDI) | WARD     | 2    | 0.808        | 0.815 | 0.822        |
| <i>C. difficile</i> agents (CDI) | WARD     | 3    | 0.810        | 0.817 | 0.823        |
| <i>C. difficile</i> agents (CDI) | WARD     | 4    | 0.834        | 0.840 | 0.846        |
| Community-onset                  | ALL      | 1    | 0.776        | 0.782 | 0.788        |
| Community-onset                  | ALL      | 2    | 0.831        | 0.836 | 0.841        |
| Community-onset                  | ALL      | 3    | 0.837        | 0.842 | 0.847        |
| Community-onset                  | ALL      | 4    | 0.857        | 0.862 | 0.867        |
| Community-onset                  | ICU      | 1    | 0.671        | 0.693 | 0.715        |
| Community-onset                  | ICU      | 2    | 0.732        | 0.752 | 0.773        |
| Community-onset                  | ICU      | 3    | 0.737        | 0.757 | 0.777        |
| Community-onset                  | ICU      | 4    | 0.749        | 0.769 | 0.788        |
| Community-onset                  | WARD     | 1    | 0.740        | 0.748 | 0.757        |
| Community-onset                  | WARD     | 2    | 0.807        | 0.814 | 0.821        |
| Community-onset                  | WARD     | 3    | 0.810        | 0.817 | 0.824        |
| Community-onset                  | WARD     | 4    | 0.836        | 0.842 | 0.849        |
| Anti-fungal                      | ALL      | 1    | 0.852        | 0.863 | 0.874        |
| Anti-fungal                      | ALL      | 2    | 0.882        | 0.891 | 0.900        |
| Anti-fungal                      | ALL      | 3    | 0.891        | 0.900 | 0.908        |
| Anti-fungal                      | ALL      | 4    | 0.887        | 0.896 | 0.905        |
| Anti-fungal                      | ICU      | 1    | 0.820        | 0.845 | 0.871        |

|                                         |      |   |       |       |       |
|-----------------------------------------|------|---|-------|-------|-------|
| Anti-fungal                             | ICU  | 2 | 0.856 | 0.877 | 0.898 |
| Anti-fungal                             | ICU  | 3 | 0.855 | 0.877 | 0.898 |
| Anti-fungal                             | ICU  | 4 | 0.858 | 0.880 | 0.902 |
| Anti-fungal                             | WARD | 1 | 0.791 | 0.810 | 0.829 |
| Anti-fungal                             | WARD | 2 | 0.835 | 0.851 | 0.867 |
| Anti-fungal                             | WARD | 3 | 0.837 | 0.854 | 0.870 |
| Anti-fungal                             | WARD | 4 | 0.835 | 0.851 | 0.868 |
| Resistant gram positive                 | ALL  | 1 | 0.858 | 0.863 | 0.868 |
| Resistant gram positive                 | ALL  | 2 | 0.893 | 0.897 | 0.902 |
| Resistant gram positive                 | ALL  | 3 | 0.893 | 0.897 | 0.901 |
| Resistant gram positive                 | ALL  | 4 | 0.906 | 0.910 | 0.913 |
| Resistant gram positive                 | ICU  | 1 | 0.798 | 0.814 | 0.830 |
| Resistant gram positive                 | ICU  | 2 | 0.836 | 0.850 | 0.864 |
| Resistant gram positive                 | ICU  | 3 | 0.830 | 0.845 | 0.860 |
| Resistant gram positive                 | ICU  | 4 | 0.848 | 0.861 | 0.875 |
| Resistant gram positive                 | WARD | 1 | 0.811 | 0.820 | 0.828 |
| Resistant gram positive                 | WARD | 2 | 0.862 | 0.869 | 0.876 |
| Resistant gram positive                 | WARD | 3 | 0.861 | 0.867 | 0.874 |
| Resistant gram positive                 | WARD | 4 | 0.875 | 0.881 | 0.888 |
| Hospital-onset                          | ALL  | 1 | 0.836 | 0.845 | 0.853 |
| Hospital-onset                          | ALL  | 2 | 0.877 | 0.884 | 0.891 |
| Hospital-onset                          | ALL  | 3 | 0.883 | 0.890 | 0.896 |
| Hospital-onset                          | ALL  | 4 | 0.899 | 0.905 | 0.911 |
| Hospital-onset                          | ICU  | 1 | 0.773 | 0.796 | 0.819 |
| Hospital-onset                          | ICU  | 2 | 0.804 | 0.824 | 0.844 |
| Hospital-onset                          | ICU  | 3 | 0.807 | 0.827 | 0.847 |
| Hospital-onset                          | ICU  | 4 | 0.820 | 0.839 | 0.858 |
| Hospital-onset                          | WARD | 1 | 0.768 | 0.783 | 0.798 |
| Hospital-onset                          | WARD | 2 | 0.829 | 0.840 | 0.852 |
| Hospital-onset                          | WARD | 3 | 0.841 | 0.853 | 0.864 |
| Hospital-onset                          | WARD | 4 | 0.850 | 0.861 | 0.873 |
| Narrow spectrum beta-lactam (Narrow BL) | ALL  | 1 | 0.852 | 0.857 | 0.862 |
| Narrow spectrum beta-lactam (Narrow BL) | ALL  | 2 | 0.872 | 0.876 | 0.881 |
| Narrow spectrum beta-lactam (Narrow BL) | ALL  | 3 | 0.871 | 0.876 | 0.881 |
| Narrow spectrum beta-lactam (Narrow BL) | ALL  | 4 | 0.883 | 0.887 | 0.892 |
| Narrow spectrum beta-lactam (Narrow BL) | ICU  | 1 | 0.795 | 0.817 | 0.839 |
| Narrow spectrum beta-lactam (Narrow BL) | ICU  | 2 | 0.825 | 0.846 | 0.867 |
| Narrow spectrum beta-lactam (Narrow BL) | ICU  | 3 | 0.815 | 0.837 | 0.858 |
| Narrow spectrum beta-lactam (Narrow BL) | ICU  | 4 | 0.830 | 0.849 | 0.869 |
| Narrow spectrum beta-lactam (Narrow BL) | WARD | 1 | 0.825 | 0.834 | 0.842 |
| Narrow spectrum beta-lactam (Narrow BL) | WARD | 2 | 0.844 | 0.853 | 0.861 |
| Narrow spectrum beta-lactam (Narrow BL) | WARD | 3 | 0.841 | 0.850 | 0.858 |
| Narrow spectrum beta-lactam (Narrow BL) | WARD | 4 | 0.855 | 0.863 | 0.871 |

AUC Values with 95% Confidence Intervals

eTable 5. Pediatric Models AUC Values

| SAAR Group                       | Location | Tier | Lower 95% CI | AUC   | Upper 95% CI |
|----------------------------------|----------|------|--------------|-------|--------------|
| All Antibacterials               | ALL      | 1    | 0.885        | 0.893 | 0.902        |
| All Antibacterials               | ALL      | 2    | 0.902        | 0.910 | 0.918        |
| All Antibacterials               | ALL      | 3    | 0.906        | 0.914 | 0.922        |
| All Antibacterials               | ALL      | 4    | 0.926        | 0.933 | 0.939        |
| All Antibacterials               | ICU      | 1    | 0.761        | 0.796 | 0.832        |
| All Antibacterials               | ICU      | 2    | 0.784        | 0.818 | 0.852        |
| All Antibacterials               | ICU      | 3    | 0.808        | 0.840 | 0.872        |
| All Antibacterials               | ICU      | 4    | 0.829        | 0.859 | 0.889        |
| All Antibacterials               | WARD     | 1    | 0.721        | 0.750 | 0.779        |
| All Antibacterials               | WARD     | 2    | 0.775        | 0.801 | 0.826        |
| All Antibacterials               | WARD     | 3    | 0.789        | 0.814 | 0.839        |
| All Antibacterials               | WARD     | 4    | 0.805        | 0.829 | 0.853        |
| Azithromycin                     | ALL      | 1    | 0.880        | 0.907 | 0.935        |
| Azithromycin                     | ALL      | 2    | 0.902        | 0.927 | 0.951        |
| Azithromycin                     | ALL      | 3    | 0.920        | 0.939 | 0.958        |
| Azithromycin                     | ALL      | 4    | 0.926        | 0.944 | 0.963        |
| <i>C. difficile</i> agents (CDI) | ALL      | 1    | 0.891        | 0.902 | 0.913        |
| <i>C. difficile</i> agents (CDI) | ALL      | 2    | 0.924        | 0.932 | 0.940        |
| <i>C. difficile</i> agents (CDI) | ALL      | 3    | 0.928        | 0.936 | 0.943        |
| <i>C. difficile</i> agents (CDI) | ALL      | 4    | 0.934        | 0.942 | 0.949        |
| <i>C. difficile</i> agents (CDI) | ICU      | 1    | 0.776        | 0.815 | 0.855        |
| <i>C. difficile</i> agents (CDI) | ICU      | 2    | 0.787        | 0.825 | 0.863        |
| <i>C. difficile</i> agents (CDI) | ICU      | 3    | 0.783        | 0.822 | 0.860        |
| <i>C. difficile</i> agents (CDI) | ICU      | 4    | 0.804        | 0.840 | 0.876        |
| <i>C. difficile</i> agents (CDI) | WARD     | 1    | 0.667        | 0.710 | 0.753        |
| <i>C. difficile</i> agents (CDI) | WARD     | 2    | 0.774        | 0.810 | 0.846        |
| <i>C. difficile</i> agents (CDI) | WARD     | 3    | 0.791        | 0.823 | 0.855        |
| <i>C. difficile</i> agents (CDI) | WARD     | 4    | 0.776        | 0.812 | 0.848        |
| Broad Community-onset (Broad CO) | ALL      | 1    | 0.869        | 0.883 | 0.897        |
| Broad Community-onset (Broad CO) | ALL      | 2    | 0.911        | 0.921 | 0.932        |
| Broad Community-onset (Broad CO) | ALL      | 3    | 0.913        | 0.923 | 0.933        |
| Broad Community-onset (Broad CO) | ALL      | 4    | 0.922        | 0.932 | 0.941        |
| Broad Community-onset (Broad CO) | ICU      | 1    | 0.719        | 0.771 | 0.822        |
| Broad Community-onset (Broad CO) | ICU      | 2    | 0.715        | 0.768 | 0.822        |
| Broad Community-onset (Broad CO) | ICU      | 3    | 0.751        | 0.798 | 0.845        |
| Broad Community-onset (Broad CO) | ICU      | 4    | 0.754        | 0.801 | 0.849        |
| Broad Community-onset (Broad CO) | WARD     | 1    | 0.680        | 0.730 | 0.779        |
| Broad Community-onset (Broad CO) | WARD     | 2    | 0.794        | 0.836 | 0.879        |
| Broad Community-onset (Broad CO) | WARD     | 3    | 0.804        | 0.842 | 0.879        |
| Broad Community-onset (Broad CO) | WARD     | 4    | 0.821        | 0.857 | 0.893        |
| Anti-fungal                      | ALL      | 1    | 0.909        | 0.933 | 0.957        |

|                                    |      |   |       |       |       |
|------------------------------------|------|---|-------|-------|-------|
| Anti-fungal                        | ALL  | 2 | 0.946 | 0.959 | 0.972 |
| Anti-fungal                        | ALL  | 3 | 0.959 | 0.970 | 0.981 |
| Anti-fungal                        | ALL  | 4 | 0.965 | 0.974 | 0.982 |
| Gram positive                      | ALL  | 1 | 0.887 | 0.901 | 0.915 |
| Gram positive                      | ALL  | 2 | 0.913 | 0.925 | 0.937 |
| Gram positive                      | ALL  | 3 | 0.921 | 0.932 | 0.943 |
| Gram positive                      | ALL  | 4 | 0.938 | 0.946 | 0.955 |
| Gram positive                      | ICU  | 1 | 0.766 | 0.810 | 0.855 |
| Gram positive                      | ICU  | 2 | 0.807 | 0.844 | 0.880 |
| Gram positive                      | ICU  | 3 | 0.821 | 0.855 | 0.889 |
| Gram positive                      | ICU  | 4 | 0.835 | 0.870 | 0.904 |
| Gram positive                      | WARD | 1 | 0.715 | 0.768 | 0.820 |
| Gram positive                      | WARD | 2 | 0.765 | 0.812 | 0.858 |
| Gram positive                      | WARD | 3 | 0.772 | 0.817 | 0.863 |
| Gram positive                      | WARD | 4 | 0.811 | 0.851 | 0.890 |
| Hospital-onset                     | ALL  | 1 | 0.924 | 0.938 | 0.951 |
| Hospital-onset                     | ALL  | 2 | 0.953 | 0.962 | 0.971 |
| Hospital-onset                     | ALL  | 3 | 0.956 | 0.964 | 0.972 |
| Hospital-onset                     | ALL  | 4 | 0.952 | 0.961 | 0.971 |
| Hospital-onset                     | ICU  | 1 | 0.862 | 0.900 | 0.938 |
| Hospital-onset                     | ICU  | 2 | 0.886 | 0.915 | 0.945 |
| Hospital-onset                     | ICU  | 3 | 0.871 | 0.906 | 0.940 |
| Hospital-onset                     | ICU  | 4 | 0.903 | 0.928 | 0.953 |
| Narrow Community-onset (Narrow CO) | ALL  | 1 | 0.869 | 0.882 | 0.895 |
| Narrow Community-onset (Narrow CO) | ALL  | 2 | 0.884 | 0.896 | 0.908 |
| Narrow Community-onset (Narrow CO) | ALL  | 3 | 0.881 | 0.894 | 0.906 |
| Narrow Community-onset (Narrow CO) | ALL  | 4 | 0.923 | 0.932 | 0.941 |
| Narrow Community-onset (Narrow CO) | ICU  | 1 | 0.619 | 0.683 | 0.748 |
| Narrow Community-onset (Narrow CO) | ICU  | 2 | 0.627 | 0.692 | 0.757 |
| Narrow Community-onset (Narrow CO) | ICU  | 3 | 0.725 | 0.782 | 0.840 |
| Narrow Community-onset (Narrow CO) | ICU  | 4 | 0.773 | 0.826 | 0.879 |
| Narrow Community-onset (Narrow CO) | WARD | 1 | 0.652 | 0.700 | 0.748 |
| Narrow Community-onset (Narrow CO) | WARD | 2 | 0.703 | 0.745 | 0.788 |
| Narrow Community-onset (Narrow CO) | WARD | 3 | 0.709 | 0.754 | 0.800 |
| Narrow Community-onset (Narrow CO) | WARD | 4 | 0.772 | 0.810 | 0.849 |

AUC Values with 95% Confidence Intervals

## eReferences

1. van Santen KL, Edwards JR, Webb AK, et al. The Standardized Antimicrobial Administration Ratio: A New Metric for Measuring and Comparing Antibiotic Use. *Clinical infectious diseases : an official publication of the Infectious Diseases Society of America*. 2018;67(2):179-185.
2. Moehring RW, Dodds Ashley ES. Developing Patient Safety Outcome Measures and Measurement Tools for Antibiotic Stewardship Programs: Metrics Guide. <https://dason.medicine.duke.edu/system/files/page-attachments/704/dason-cdcfinalanalysistool-r11-21.pdf>. Published 2017. Accessed 2019.
3. Tan C, Vermeulen M, Wang X, Zvonar R, Garber G, Daneman N. Variability in antibiotic use across Ontario acute care hospitals. *The Journal of antimicrobial chemotherapy*. 2017;72(2):554-563.
4. Agency for Healthcare Research and Quality: Beta Clinical Classifications Software (CCS) for ICD-10-CM/PCS. <https://www.hcup-us.ahrq.gov/toolssoftware/ccs10/ccs10.jsp>. Published 2018. Accessed 2019.
5. O'Leary EN, Edwards JR, Srinivasan A, et al. National Healthcare Safety Network Standardized Antimicrobial Administration Ratios (SAARs): A Progress Report and Risk Modeling Update Using 2017 Data. *Clinical Infectious Diseases*. 2020.
